# Supplementary material
Source: Springer Nature journal article supplement (https://www.springermedizin.de/resource/supplementary/12936_2012_2486_MOESM1_ESM.pdf/9543076)

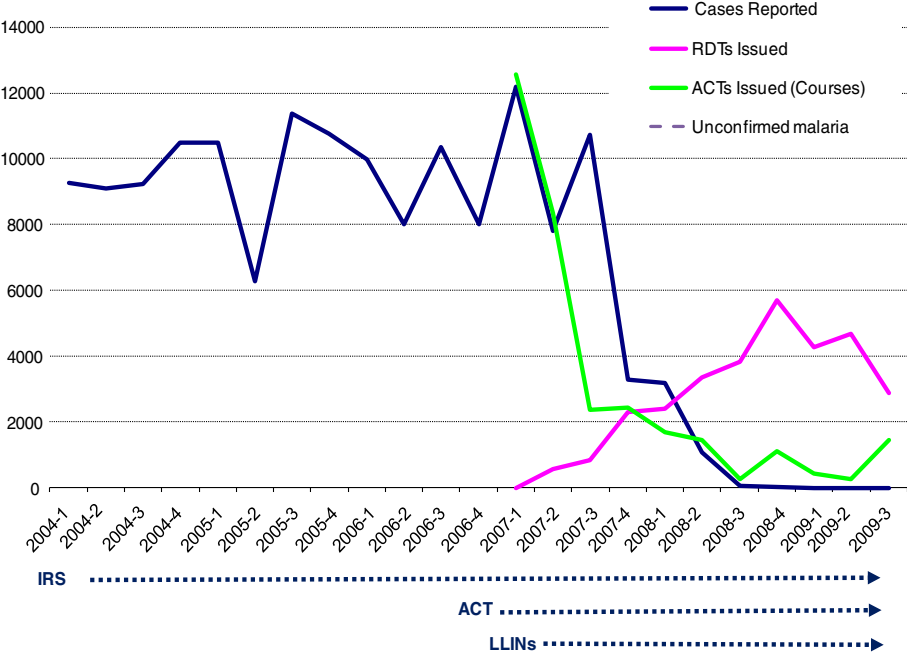

Supplement: MOESM1 [file 9543076]
